# Supplementary material
Source: Springer Nature journal article supplement (https://www.springermedizin.de/resource/supplementary/12894_2008_121_MOESM7_ESM.pdf/9513966)
Supplement: MOESM7 [file 9513966]

*Table 3. Plasma-estradiol in the two admissions*

|                                  | Mean $\pm$ SD                |
|----------------------------------|------------------------------|
|                                  | p-estradiol (nmol/l)         |
| "low p-estradiol" - 1.admission  | 0.31 $\pm$ 0.08 (0.23-0.43)  |
| "high p-estradiol" - 2.admission | 0.95 $\pm$ 0.25 (0.69-1.33)* |

Values are mean  $\pm$  SD. \*Low/high:  $p < 0.001$
